# Supplementary material for: In situ hydroxyl radical generation using the synergism of the Co–Ni bimetallic centres of a developed nanocatalyst with potent efficiency for degrading toxic water pollutants
Source: Royal Society of Chemistry journal article supplement (doi:10.1039/c9qm00628a), 2019-12-20
Supplement: c9qm00628a1.pdf [file c9qm00628a1.pdf]

## In-situ hydroxyl radical generation using the synergism of Co-Ni bimetallic centres of developed nanocatalyst with potent efficiency of degrading toxic water pollutants

Rakesh K. Sharma\*, Bhavya Arora, Shivani Sharma, Sriparna Dutta, Aditi Sharma, Sneha Yadav and Kanika Solanki

Green Chemistry Network Centre, Department of Chemistry, University of Delhi, New Delhi-110007, India. Fax: +91-011-27666250; Tel: 011-276666250

Email: rksharmagreenchem@hotmail.com

### Supporting Information

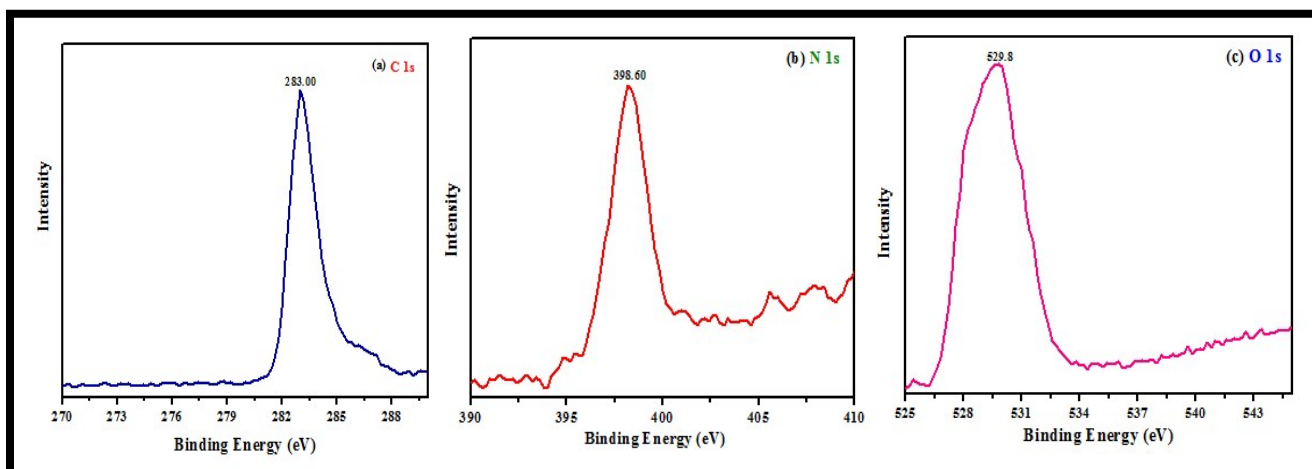

**Fig. S1** Core level spectra of (a) C 1s (b) N 1s (c) O 1s of Co-Ni@CS@Fe<sub>3</sub>O<sub>4</sub>

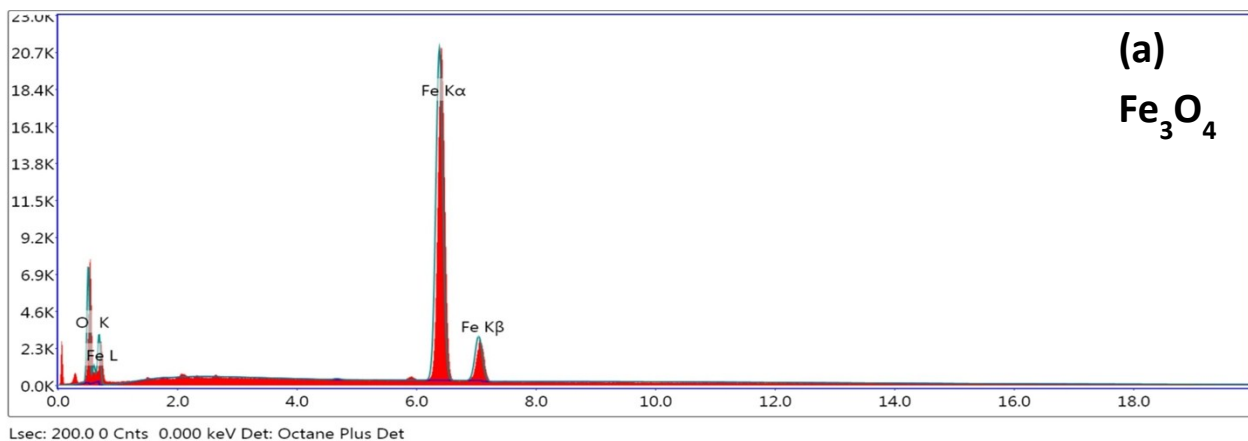

**Fig. S2** EDS spectra of  $\text{Fe}_3\text{O}_4$ .

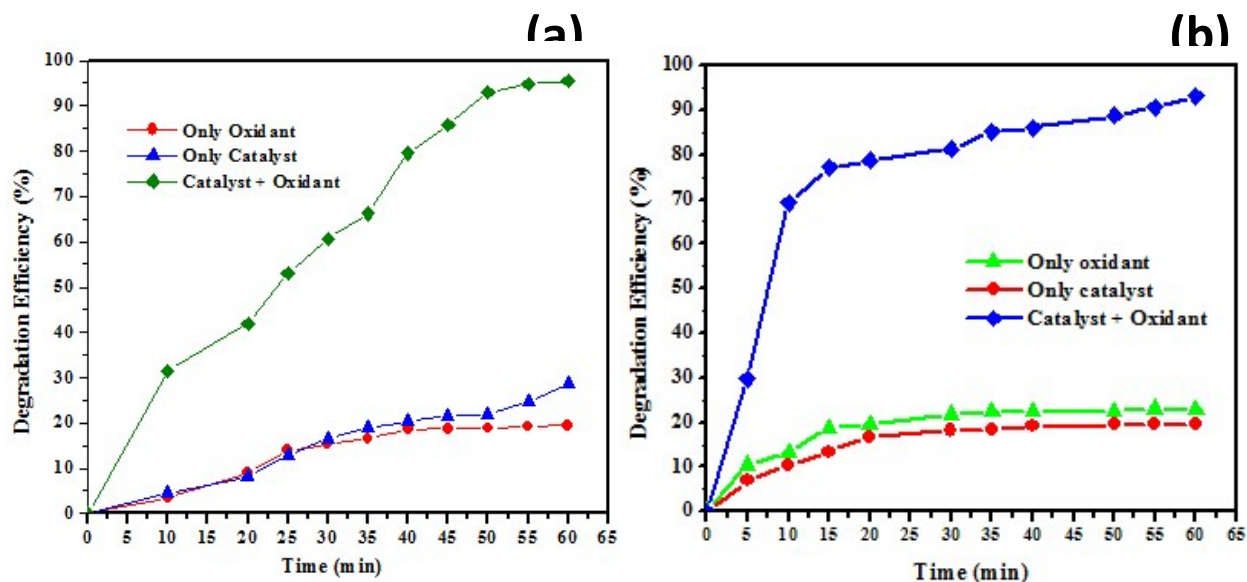

**Fig. S3** Graph plot of degradation efficiency (%) as a function of time (min) (a) 2,4-D ( reaction conditions : 50 mL stock solution (100 mg/L), 1 mL  $\text{H}_2\text{O}_2$ , 10 mg catalyst, pH = 7, 60 min, r.t.,  $\lambda_{\text{max}} = 284 \text{ nm}$ ) (b) MO (reaction conditions : 50 mL stock solution (10 mg/L), 2 mL  $\text{H}_2\text{O}_2$ , 20 mg catalyst, pH = 7, 60 min, r.t.,  $\lambda_{\text{max}} = 465 \text{ nm}$ ).

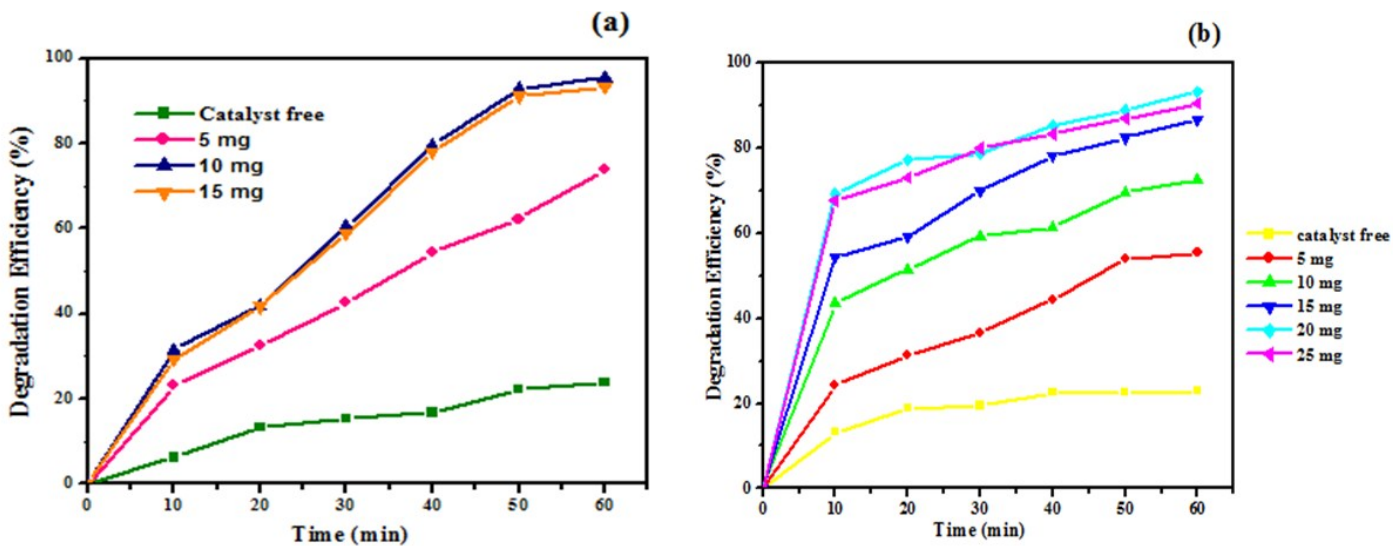

**Fig. S4** Effect of catalyst dosage on the catalytic degradation of (a) 2,4-D (reaction conditions : 50 mL stock solution (100 mg/L), x mg catalyst 1 mL H<sub>2</sub>O<sub>2</sub>, pH = 7, 60 min, r.t.,  $\lambda_{\max}$  = 284 nm) (b) MO (reaction conditions : 50 mL stock solution (10 mg/L), x mg catalyst, 2 mL H<sub>2</sub>O<sub>2</sub>, pH = 7, 60 min, r.t.,  $\lambda_{\max}$  = 465 nm).

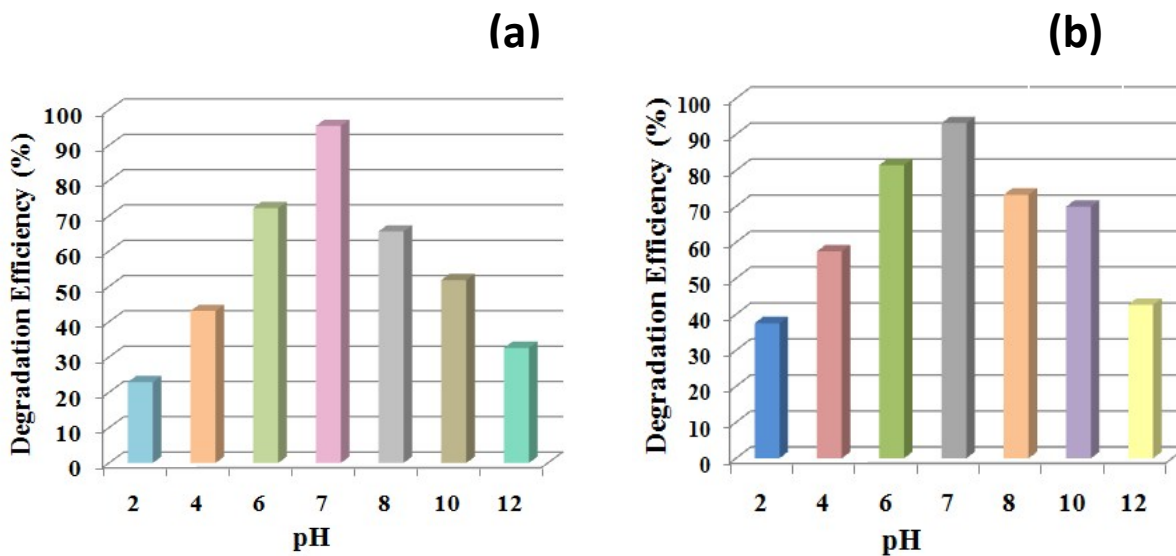

**Fig. S5** Effect of pH on the catalytic degradation of (a) 2,4-D (reaction conditions : 50 mL stock solution (100 mg/L), 10 mg catalyst, 1 mL H<sub>2</sub>O<sub>2</sub>, 60 min, r.t.,  $\lambda_{\max}$  = 284 nm) (b) MO (reaction

conditions : 50 mL stock solution (10 mg/L), 10 mg catalyst, 2 mL H<sub>2</sub>O<sub>2</sub>, 60 min, r.t.,  $\lambda_{\text{max}} = 465$  nm).

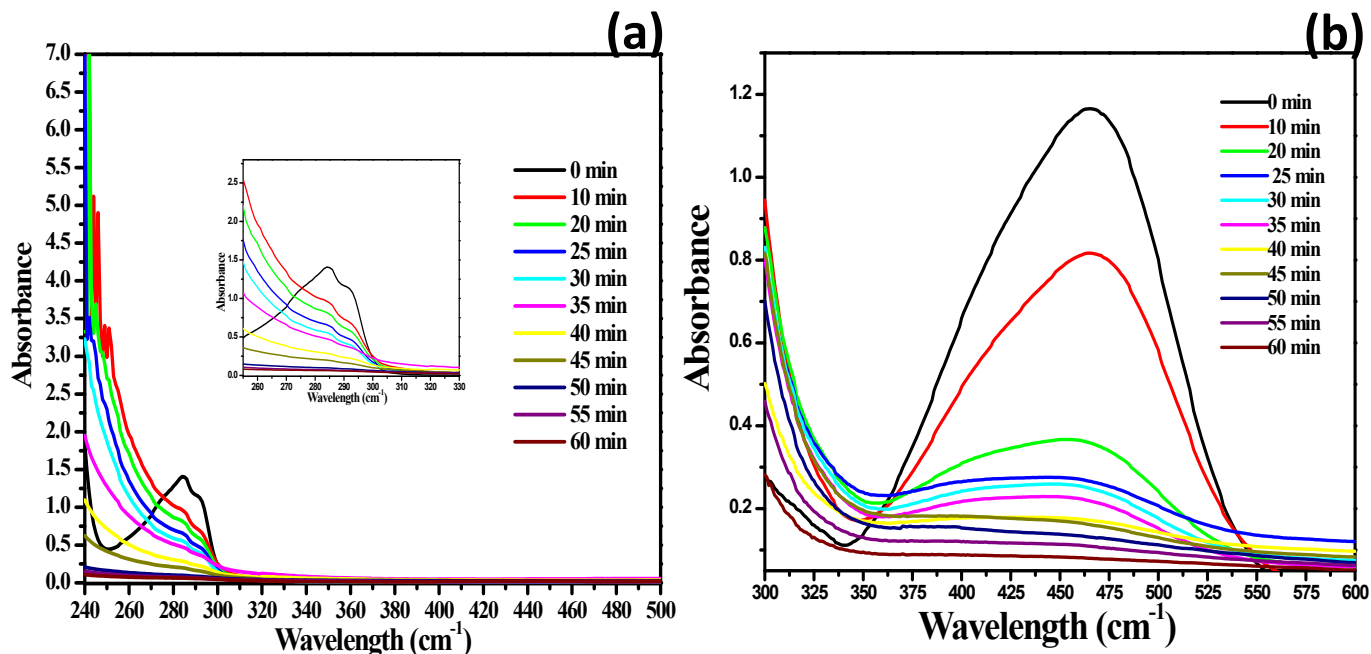

**Fig. S6(a)** UV-Vis plot of degradation of 2,4-D under optimized conditions ( reaction conditions : 50 mL stock solution (100 mg/L), 1 mL H<sub>2</sub>O<sub>2</sub>, 10 mg catalyst, pH = 7, 60 min, r.t.,  $\lambda_{\text{max}} = 284$  nm) (b) UV-Vis plot of degradation of MO under optimized reaction conditions (50 mL stock solution (10 mg/L), 2 mL H<sub>2</sub>O<sub>2</sub>, 20 mg catalyst, pH = 7, 60 min, r.t.,  $\lambda_{\text{max}} = 465$  nm).

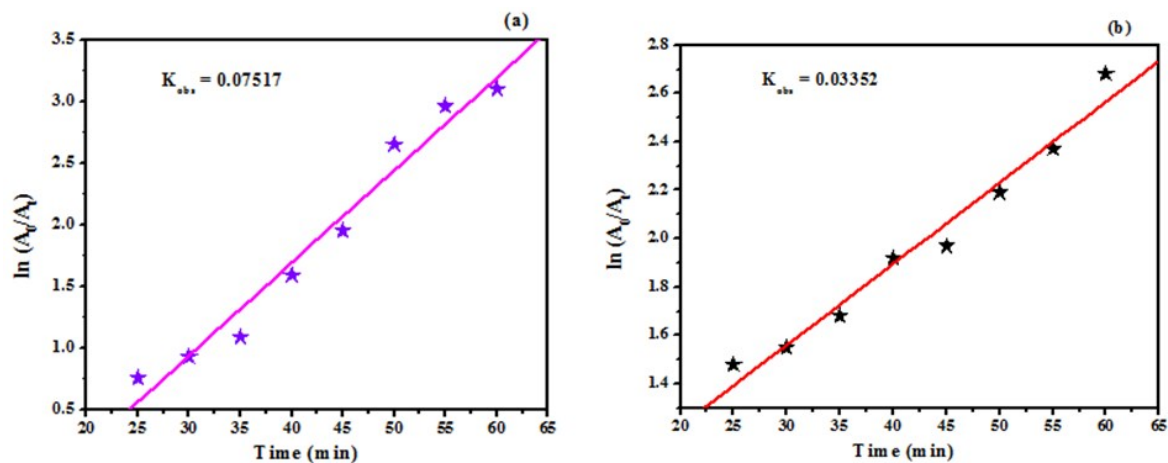

Fig. S7 Kinetics analysis of oxidative degradation of (a) 2,4-D and (b) MO.

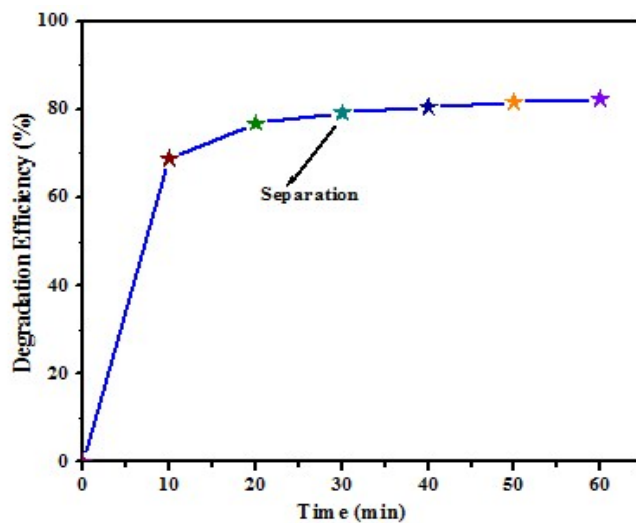

Fig. S8 Degradation efficiency versus reaction time in a leaching experiment.

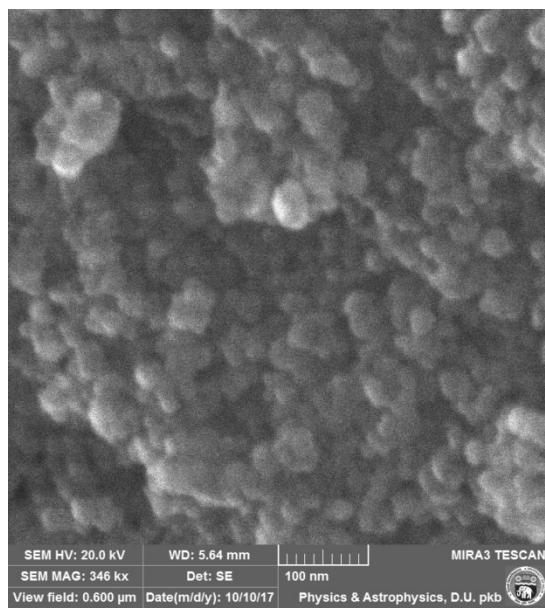

**Fig. S9** FE-SEM image of recovered catalyst Co-Ni@CS@Fe<sub>3</sub>O<sub>4</sub>.
